# Supplementary material for: Integrative analysis of m3C associated genes reveals METTL2A as a potential oncogene in breast Cancer
Source: Springer Nature journal article supplement (doi:10.1186/s12967-022-03683-2), 2022-10-20

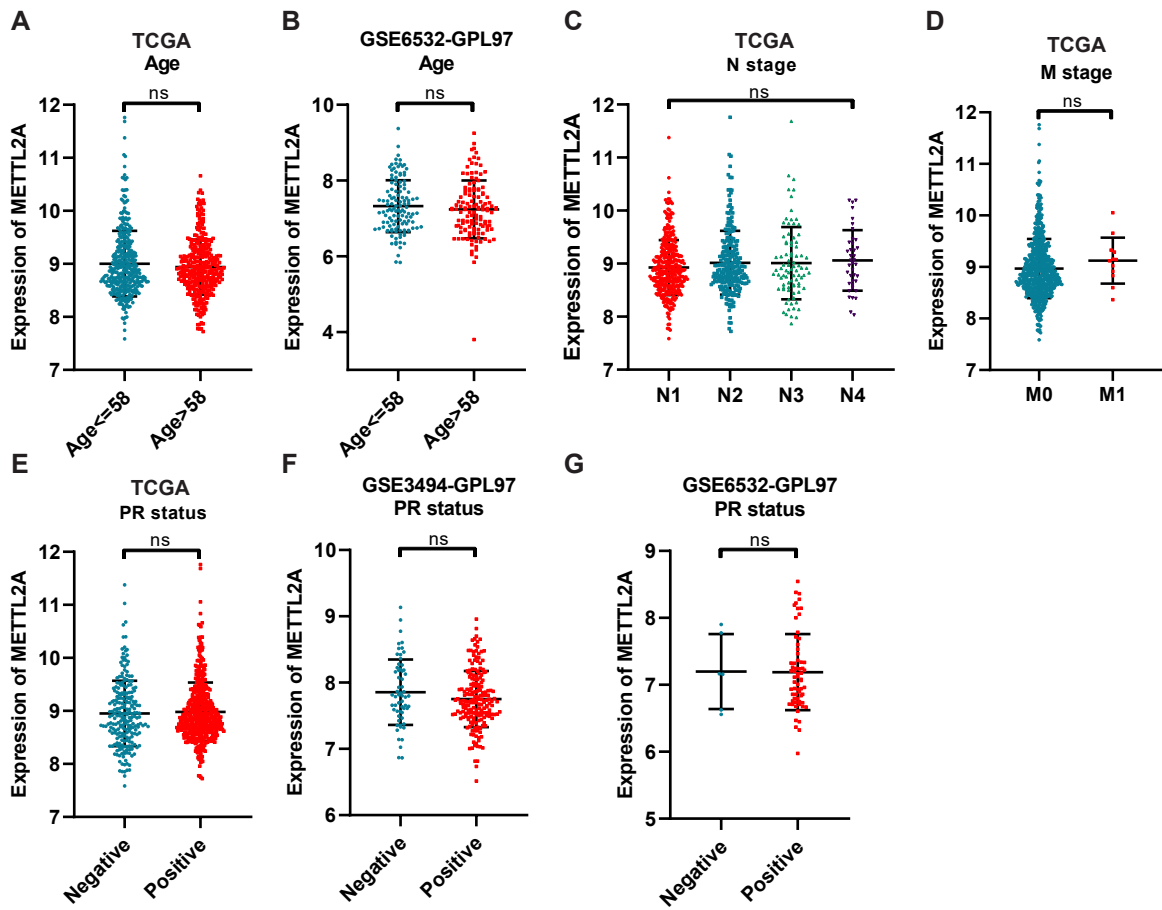

Supplement: MOESM2 [file 23624448]
